# Supplementary material for: Technological and policy options for the defossilisation of chemical manufacturing
Source: Royal Society of Chemistry journal article supplement (doi:10.1039/d4su00601a), 2024-12-05
Supplement: d4su00601a1.pdf [file d4su00601a1.pdf]

1           **Supplementary: Technological and policy options for the**  
2                           **defossilisation of chemical manufacturing**

3

4

5       Qiuchi Pan<sup>1</sup>, Martin Held<sup>1,\*</sup>, Jan Backmann<sup>2,\*</sup>

6

7       <sup>1</sup>Department of Biosystems Science and Engineering, ETH Zurich, Schanzenstrasse 44,  
8       4056 Basel, Switzerland.

9       <sup>2</sup>F. Hoffmann-La Roche Ltd, Grenzacherstrasse 124, 4070 Basel, Switzerland.

## 10 1. Primary chemicals

11 The chemical industry comprises an intricate network encompassing more than 50,000  
 12 compounds. Within this expansive network, seven chemicals are referred to as primary  
 13 chemicals, i.e. ammonia, methanol and HVCs, from which the vast majority of the  
 14 remaining ones are synthesised (see **Table S1**). Today, around 65% of the total energy  
 15 required by the chemical industry is attributed to the production of primary chemicals  
 16 (8.4 PWh out of 13.2 PWh in 2017), primarily sourced from fossil fuel and supplemented  
 17 by biomass and waste, heat and electricity<sup>1, 2</sup>.

18 The states of the production volume of the primary chemicals are being reported in the  
 19 International Energy Agency (IEA), and they also projected the chemical growth of the  
 20 chemical industry published by IEA in 2013, and in 2018, they served as the basis of the  
 21 publications included in our analysis.

22

23 **Table S1. Conventional fossil fuel-based production routes for primary chemicals and**  
 24 **their production volume as of 2023.**

| Primary chemicals                            |                      |                                                                                         | Production volume 2023* (Mt/a) | Carbon in 2023 (MtC/a) | Main applications                                               | Conventional production routes                       |
|----------------------------------------------|----------------------|-----------------------------------------------------------------------------------------|--------------------------------|------------------------|-----------------------------------------------------------------|------------------------------------------------------|
| Ammonia (NH <sub>3</sub> ) <sup>3</sup>      |                      |                                                                                         | 196                            | 0                      | Fertilisers, plastics, explosives and synthetic fibres          | Steam methane reforming (SMR), coal gasification     |
| Methanol (CH <sub>4</sub> O) <sup>4, 5</sup> |                      |                                                                                         | 117                            | 44                     | Fuel additives, plastics, plywood, paints, explosives, textiles | Natural gas-based steam reforming, coal gasification |
| HVCs                                         | Olefins <sup>6</sup> | Ethylene (C <sub>2</sub> H <sub>4</sub> )<br>Propylene (C <sub>3</sub> H <sub>6</sub> ) | 412                            | 360                    | Plastics, detergent, rubber                                     | Byproducts of refining operations; steam cracking;   |

|  |                    |                                                       |  |  |                                         |                             |
|--|--------------------|-------------------------------------------------------|--|--|-----------------------------------------|-----------------------------|
|  | BTX aromatics<br>7 | Benzene<br>(C <sub>6</sub> H <sub>6</sub> )           |  |  | Plastics, nylon,<br>gasoline,<br>resins | fluid catalytic<br>cracking |
|  |                    | Toluene<br>(C <sub>7</sub> H <sub>8</sub> )           |  |  |                                         |                             |
|  |                    | Mixed<br>xylenes<br>(C <sub>8</sub> H <sub>10</sub> ) |  |  |                                         |                             |

25

26 \* Production volume of primary chemicals in 2023 as interpolated based on 2017 production  
27 volumes and compounded average growth rate (CAGR) reported by IEA<sup>8</sup> (see **Table S2**). HVCs,  
28 high-value chemicals.

29

30 Ammonia is at the roots of the global food chain and finds its main application as fertiliser  
31 being a substantial and limiting nutrient for plant growth (0.03 to 7 wt% N per dry plant  
32 material<sup>9</sup>). As plant-based food production is in the order of 1 billion tons dry weight (9.5  
33 billion tons fresh weight in 2021<sup>10</sup>), the amount of nitrogen consumed by humans and  
34 livestock is in excess of 70 Mt ammonia equivalents<sup>11</sup>. Due to poor retention in soil and  
35 rapid volatilisation<sup>12</sup>, it's no surprise that 70% of the 190 Mt of ammonia produced in 2020  
36 are used as mineral fertilisers, while the remainder is used industrially, e.g. for the  
37 synthesis of plastics (e.g. polyacrylonitrile and isocyanates for polyurethanes), synthetic  
38 fibres (e.g. hexamethylenediamine for nylon 66 and caprolactam for nylon 6), rubber (e.g.  
39 nitrile butadiene), or explosives<sup>13</sup>. Owing to its energy density<sup>14</sup>, ammonia is also  
40 anticipated to in future play a significant role as chemical hydrogen carrier and fuel for  
41 the transport sector<sup>15</sup>.

42 Energy and hydrogen required for ammonia synthesis are primarily obtained by natural  
43 gas-based gas reforming and coal gasification processes. Approximately 50% to 65% of  
44 the energy is used in feedstock, while the remaining is utilised in process energy, mainly  
45 for generating heat<sup>13</sup>. Given its irreplaceable role in agriculture, with an anticipated

46 increase in global population by 2050 and in light of cross-sector applications to come, the  
47 demand for ammonia is expected to grow dramatically<sup>16</sup>.

48 Methanol is currently predominantly produced by gas-based steam reforming or coal  
49 gasification starting from fossil carbon. It serves as a key precursor for the synthesis of  
50 HVCs through well-established methanol-to-olefin (MTO)<sup>17</sup> or near-commercial  
51 methanol-to-aromatics (MTA) conversion routes<sup>18, 19</sup>. Other than that, methanol finds  
52 application in gasoline and diesel blending, as well as in the production of biodiesel. It is  
53 also utilised in the manufacture of acetic acid for paints and formaldehyde for plywood  
54 production<sup>5</sup>. Furthermore and similar to ammonia, methanol's significance extends to the  
55 energy and transport sector, where the production of non-fossil methanol offers means  
56 to enhance the value of renewable power and efficiently store hydrogen in a liquid form  
57 for later use<sup>5</sup>.

58 The remaining five of the primary chemicals are predominantly produced by steam  
59 cracking of naphtha derived from fossil reserves yielding ethylene, propylene, benzene,  
60 toluene, and mixed xylenes, collectively categorised as HVCs<sup>20</sup>. Noteworthy ethylene is  
61 also synthesised from biogenic ethanol produced from plant sugars or from industrial off-  
62 gases<sup>21-23</sup>. HVCs primarily serve as raw materials for synthesis of thermoplastics (e.g. in  
63 2019, 110 Mt/a polyethylene [LDPE and HDPE] from ethylene, 73 Mt/a polypropylene  
64 from propylene, and 51 Mt/a PVC from benzene<sup>24</sup>). With continuing population growth  
65 and a trend towards elevated living standards, the demand for plastics and HVCs is  
66 expected to witness substantial increases.

67

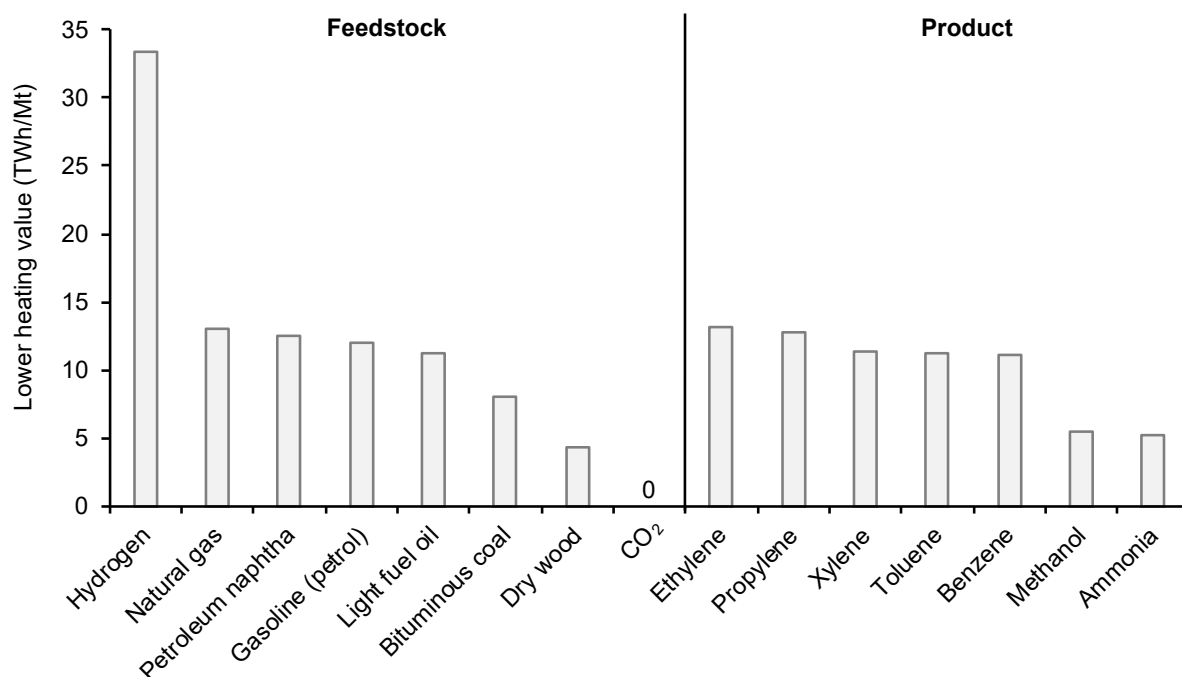

69

70 **Figure S1.** Lower heating value (LHV, net heat of combustion of chemical at standard  
 71 state) of feedstock and primary chemicals<sup>25-27</sup>. The feedstock category encompasses fossil  
 72 fuels (natural gas, petroleum naphtha, gasoline, light fuel oil and bituminous coal),  
 73 biomass (dry wood), and CCU (CO<sub>2</sub> and hydrogen). The products category includes the  
 74 seven primary chemicals, ammonia, methanol, and the HVCs (ethylene, propylene,  
 75 benzene, toluene, and xylene).

76

77 Throughout the production of primary chemicals, the process essentially involves  
 78 transferring molecules and chemical energy from the fossil fuel feedstocks (**Figure S1**,  
 79 values are shown in lower heating value [LHV] of the chemicals, indicating the enthalpy of  
 80 combustion of chemicals under standard conditions). Carbon molecules are transferred  
 81 from fossil carbon to the carbon in primary chemicals. Chemical energy, carried by  
 82 electrons, is transferred to the primary chemicals and also provides the process energy,  
 83 thus no additional energy is needed. Fossil fuels inherently carry both carbon molecules  
 84 and hydrogen atoms with electrons, enabling both transformations to occur during  
 85 combustion. However, defossilised feedstocks typically carry fewer electrons. For

86 example, the lower heating value (LHV) of dry wood is 4.3 TWh/Mt, which is lower than  
87 that of primary chemical products, meaning external electrons must be sourced. CO<sub>2</sub>  
88 presents an even more extreme case, containing carbon molecules but virtually no  
89 electrons, resulting in a LHV of zero. Consequently, electrons must come entirely from  
90 external sources, with hydrogen often being favoured due to its high energy content.

## 91 **2. Assessment of the net-zero transition scenarios**

92 The common goal of all analysed net-zero transition scenarios is the reduction of CO<sub>2</sub>  
93 emissions down to near net zero. In an effort to enable direct comparison of the provided  
94 data among the net-zero transition scenarios and ensure data transparency, we first  
95 harmonised the chemicals and inputs outputs by weight (Mt/a) and then converted them  
96 consistently to million metric tons of embedded carbon (MtC/a). For feedstock and energy  
97 inputs (fossil fuels, biomass, hydrogen, and electricity), we generally used watt-hours per  
98 annum (Wh/a).

99 In aligning data from diverse sources, not all data were provided in every piece of  
100 literature. We only subtracted the corresponding data for primary chemical production,  
101 which includes ammonia (urea in EmiH and EmiL), methanol, and HVCs. The production  
102 volumes were derived from global chemical flows. Regarding feedstock requirements,  
103 chemicals produced from recyclates were excluded, as they represent reductions in virgin  
104 chemical demand. The volumes of fossil fuels, biomass, and CCU feedstocks were  
105 extracted, and the carbon embedded in these feedstocks was calculated. Energy  
106 requirements were divided into two components: the energy embedded in the feedstock,  
107 calculated using their LHV, and the energy needed for manufacturing processes. For CCU,  
108 this includes the energy in hydrogen along with energy losses during hydrogen generation.

109 For ZERO1.5, LC-NFAX and HC-NFAX, all relevant information is provided in the main text  
110 and the supplementary files. For NZE2050H, the production volume of primary chemicals  
111 in 2050 is reported, with the feedstock requirement calculated based on global chemical  
112 flows using the LHV of hydrogen, methanol, and biomass to determine corresponding  
113 feedstock volumes. The energy requirement is also reported. For EmiH and EmiL, the

114 production volume of primary chemicals in 2050 is calculated from the global CO<sub>2</sub> demand  
115 for chemical feedstocks. The feedstock requirement is reported, and the energy  
116 requirement is calculated as shown in **Table S3**. For TRLH, all necessary information is  
117 included.

118 Calculations and estimations were performed to further process the data. These  
119 calculations may not perfectly align with the original data. However, as our intent is to  
120 allow the reader to readily get an overview of the state of the art in the field, we are  
121 considering this step as both permissible and inevitable.

122 Our work may also be understood as an invitation to the community to standardise  
123 reporting procedures in order to in future allow direct comparison of results and  
124 projections from different sources.



125 **Supplementary figures**

126

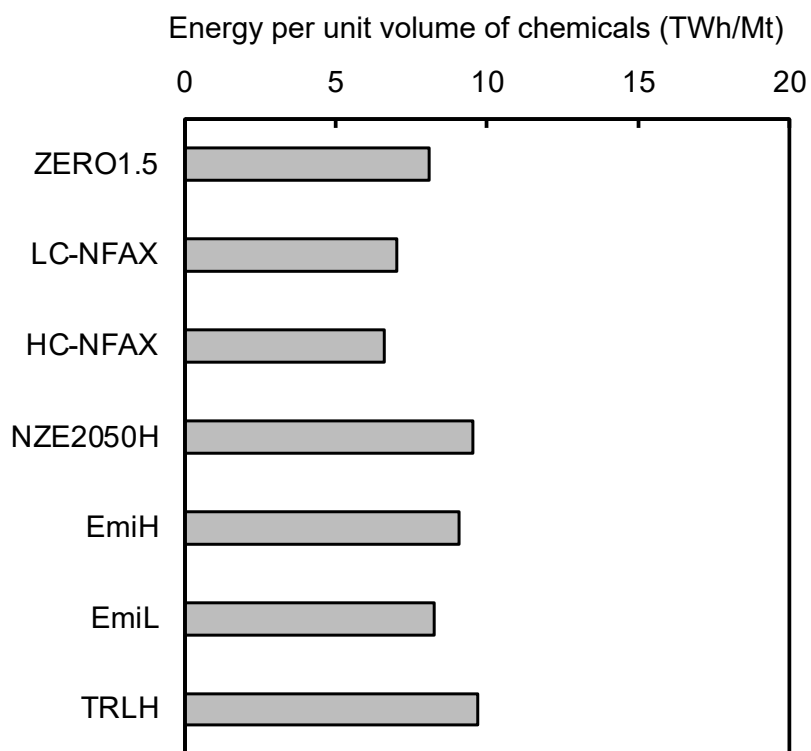

127

128 **Figure S2.** Specific energy content of the *de novo* synthesised chemicals based on actual  
129 production volumes (recycling excluded) and lower heating values.

130

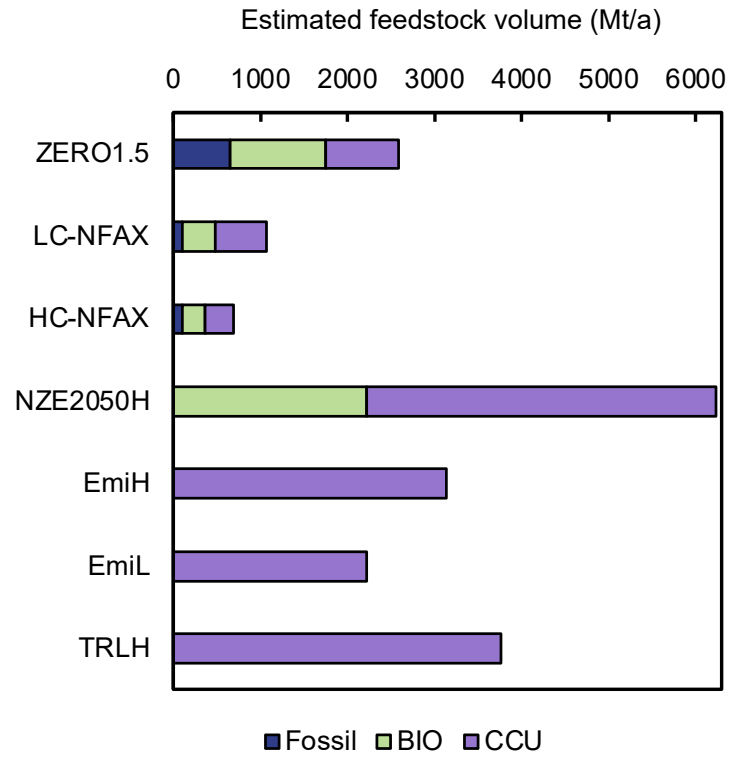

131

132

133

**Figure S3.** Estimated feedstock volume for the net-zero transition scenarios based on carbon content of natural gas 75%C, dry wood 50%C<sup>28</sup>, CO<sub>2</sub> 27%C.

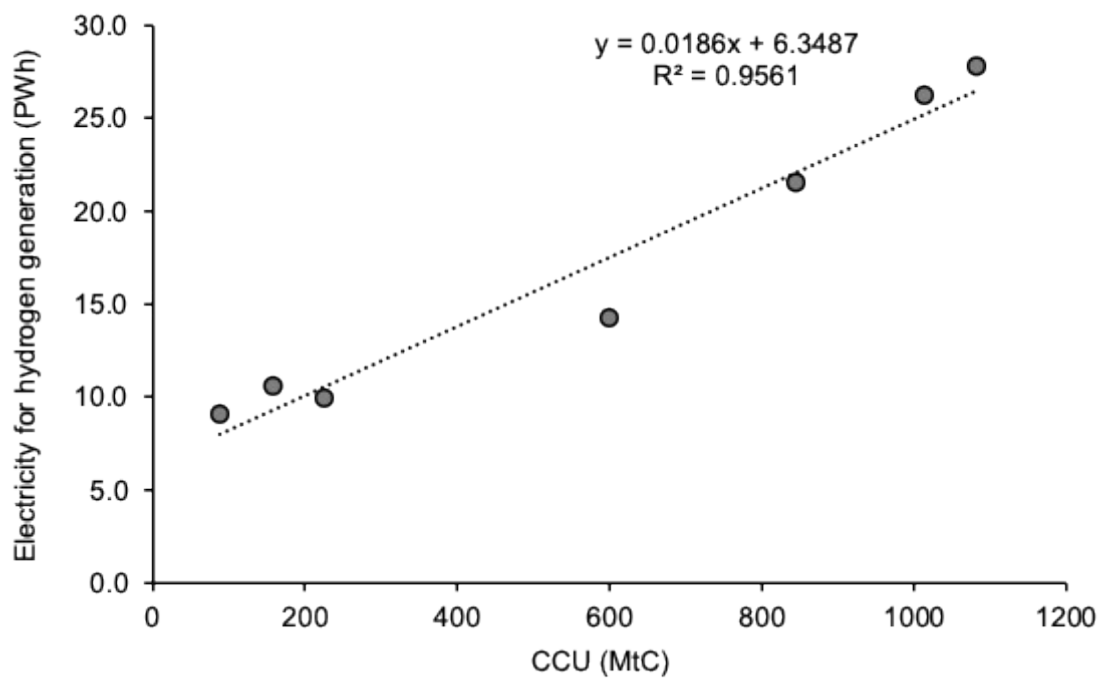

134

135 **Figure S4.** Hydrogen generation-related electricity is positively correlated to the amount  
136 of carbon supplied through CCU across all the net-zero transition scenarios.

137

## 138 Supplementary tables

139 **Table S2.** Production volumes of primary chemicals.

| Production volume (Mt/a) |           | 2017*      | 2023       | 2030*      | 2050*       |
|--------------------------|-----------|------------|------------|------------|-------------|
| Ammonia                  |           | 183        | 196        | 213        | 241         |
| Methanol                 |           | 96         | 117        | 147        | 180         |
| HVCs                     | Ethylene  | 175        | 151        | 207        | 255         |
|                          | Propylene | 116        | 102        | 135        | 164         |
|                          | BTX       | 121        | 106        | 141        | 160         |
| <b>Total</b>             |           | <b>639</b> | <b>725</b> | <b>843</b> | <b>1001</b> |

140 \* 2017, 2030, and 2050 data were extracted from IEA (RTS scenario)<sup>8</sup>. The production volumes  
 141 of 2023 are estimated on the basis of the production volume of 2017 and the CAGR between  
 142 2017 and 2030.

143

144 **Table S3.** Process energy assumptions made for **EmiH** and **EmiL**<sup>29</sup>.

|                    | Energy requirement (TWh/Mt) | Notes                                                                                                                                                       |
|--------------------|-----------------------------|-------------------------------------------------------------------------------------------------------------------------------------------------------------|
| <b>Urea</b>        | 3.1                         | 1.72 TWh/Mt energy is required for ammonia production, 55% of ammonia will be converted into urea.                                                          |
| <b>Methanol</b>    | 2.1                         |                                                                                                                                                             |
| <b>HVC-olefins</b> | 7.2                         | 2.83 tons of methanol are required per ton of olefin, which equals 5.82 TWh to provide the methanol and 1.39 TWh for the methanol-to-olefin process energy. |
| <b>HVC-BTX</b>     | 10.2                        | 4.3 tons of methanol are required per ton of BTX, which equals 8.84 TWh to provide methanol and 1.39 TWh for the methanol-to-BTX process energy.            |

145

146

147 **Environmental pillar**

148 **Table S4.** Climate action

| <b>Technological option</b> | <b>Rating and rationale</b>                                                                                                                                                                                                                                                                                                                                                       |
|-----------------------------|-----------------------------------------------------------------------------------------------------------------------------------------------------------------------------------------------------------------------------------------------------------------------------------------------------------------------------------------------------------------------------------|
| FOS                         | (–) All the carbon that is extracted as a component of fossil mineral resources is ultimately emitted into the atmosphere as a component of climate-damaging gases.                                                                                                                                                                                                               |
| FOS/CCS                     | (0) The emission of climate-damaging gases is being sequestered.                                                                                                                                                                                                                                                                                                                  |
| BIO                         | (–/0) The carbon footprint depends heavily on the specific technologies (such as traditional intensive agriculture or algae-derived biomass production) used. Some of the technologies (e.g. sustainable forestry) could even have negative emissions and depending on the end-of-life treatment of the manufactured products, BIO has the potential to cause negative emissions. |
| CCU                         | (0) Essentially no emissions of climate-damaging gases. Depending on the end-of-life treatment of the manufactured products, this technology has the potential of negative emissions.                                                                                                                                                                                             |

149

150 **Table S5.** Biodiversity conservation

| <b>Technological option</b> | <b>Rating and rationale</b>                                                                                                                                                                                                                                                                                                           |
|-----------------------------|---------------------------------------------------------------------------------------------------------------------------------------------------------------------------------------------------------------------------------------------------------------------------------------------------------------------------------------|
| FOS                         | (–) Mining of fossil reserves is associated with the utilisation of natural habitats and it's well known from the past that the excavation process poses a high burden that materials can destroy them. Mining is inevitably linked to the deposits, which are often located close to the important habitats.                         |
| FOS/CCS                     | (–) Essentially the same as FOS. In addition, there is a certain land requirement for the installations required for CO <sub>2</sub> sequestration.                                                                                                                                                                                   |
| BIO                         | (–/0/+) Impact depends on the specific technology used: expansion of conventional agriculture can destroy habitats while the use of biomass from sustainably reforested areas could certainly have positive effects. Third-generation biotechnological processes have the potential to excel in terms of environmental compatibility. |
| CCU                         | (+) Only limited land use for gas conversion if obtained from concentrated point sources. In addition, areas can always be used whose use does not lead to any loss of biodiversity such as existing industrial                                                                                                                       |

|  |                                                                                                                                                                                                                                                                                                                                                      |
|--|------------------------------------------------------------------------------------------------------------------------------------------------------------------------------------------------------------------------------------------------------------------------------------------------------------------------------------------------------|
|  | parks. A challenge in terms of biodiversity protection is the significant use of water for the electrolytic production of hydrogen and the rather high requirements for renewable energy. This also applies if electrochemical, electromicrobial or photochemical processes are used, i.e. if the water does not have to be electrolysed beforehand. |
|--|------------------------------------------------------------------------------------------------------------------------------------------------------------------------------------------------------------------------------------------------------------------------------------------------------------------------------------------------------|

151

152 **Table S6.** Pollution prevention

| <b>Technological option</b> | <b>Rating and rationale</b>                                                                                                                                                                                                                                                                                                                                                                   |
|-----------------------------|-----------------------------------------------------------------------------------------------------------------------------------------------------------------------------------------------------------------------------------------------------------------------------------------------------------------------------------------------------------------------------------------------|
| FOS                         | (-) Hard to control emissions (e.g. methane) during extraction and processing plus accidental spills. Only limited numbers of suitable sites which could be frequently vulnerable habitats. Massive use of chemicals during mining and processing.                                                                                                                                            |
| FOS/CCS                     | (-) Essentially the same as FOS.                                                                                                                                                                                                                                                                                                                                                              |
| BIO                         | (-/0) The pollution depends very much on the specific technology used. Conventional intensive agriculture for instance is accompanied with significant emissions of chemical substances, such as fertilisers, NO <sub>x</sub> and pesticides. Contained systems for solar-powered algae/microbial cultivation (third-generation BIO) would need to be evaluated based on wastewater handling. |
| CCU                         | (0) This technology has an intrinsically low potential of pollution. However, if seawater is used for preparation of demineralised water for electro- or photochemical reactions, it must first be desalinated according to the current state of technology. This produces vast streams of desalination brine which may either have to carefully given back to the oceans or sequestered.     |

153

154 **Table S7.** Conservation of resources

| <b>Technological option</b> | <b>Rating and rationale</b>                                                                                                                  |
|-----------------------------|----------------------------------------------------------------------------------------------------------------------------------------------|
| FOS                         | (-) This technology area is based on the continued consumption of limited fossil carbon sources.                                             |
| FOS/CCS                     | (-) This technology area is based on the continued consumption of limited fossil carbon sources.                                             |
| BIO                         | (-/0/+) The outcome depends very much on how the biomass is being generated, i.e. type of agriculture or forestry or fermentation, etc. This |

|     |                                                                                                                                                                                                                           |
|-----|---------------------------------------------------------------------------------------------------------------------------------------------------------------------------------------------------------------------------|
|     | technology could have certain advantages over CCU when it comes to producing more complex molecules which are not so easily obtained with chemical synthesis.                                                             |
| CCU | (+) CO <sub>2</sub> is an unlimited resource. The use of water and vast amounts of energy for electrolysis or electrochemical or photochemical reactors will, however, require resource-saving management <sup>30</sup> . |

156 **Social pillar**157 **Table S8.** Health and well-being of the workers

| <b>Technological option</b> | <b>Rating and rationale</b>                                                                                                                                                                                                                                                                                                                                                                                                                                                                              |
|-----------------------------|----------------------------------------------------------------------------------------------------------------------------------------------------------------------------------------------------------------------------------------------------------------------------------------------------------------------------------------------------------------------------------------------------------------------------------------------------------------------------------------------------------|
| FOS                         | (–/0/+) Depends on the specific practised working conditions and the impact on the communities in contact with the mining and processing sites. Intrinsic toxicological properties of the substances present in the mined materials and in the chemicals used for extraction are to be taken care of. Sites of mining cannot be freely chosen but depend on the location of the deposits, and therefore this parameter depends on the occupational health and safety conditions at these specific sites. |
| FOS/CCS                     | (–/0/+) The same as FOS. Depends on the specific practised working conditions and the impact on the communities in contact with the mining and processing sites of the fossil resource as well as with the sites where sequestration takes place.                                                                                                                                                                                                                                                        |
| BIO                         | (–/0/+) Depends on the specific working conditions practised and the impact on the communities near which the biomass is produced and processed. As locations are spread all over the world, the health and safety conditions in these different locations can vary greatly.                                                                                                                                                                                                                             |
| CCU                         | (0/+) Depends also on the local and national regulatory requirements for the protection of workers and communities; however, novel technologies offer in most cases better working conditions than conventional ones as they are usually developed taking into considerations the state of the art in the respective areas <sup>31</sup> .                                                                                                                                                               |

158

159 **Table S9.** Social equity and justice

| <b>Technological option</b> | <b>Rating and rationale</b>                                                                                                                                                                                                                                                                                        |
|-----------------------------|--------------------------------------------------------------------------------------------------------------------------------------------------------------------------------------------------------------------------------------------------------------------------------------------------------------------|
| FOS                         | (–/0/+) Depends on the specific practised conditions in the country where mining and processing takes place.                                                                                                                                                                                                       |
| FOS/CCS                     | (–/0/+) Depends on the specific practised conditions in the country where mining and processing takes place. In addition, with this option, appropriate worker protection not only has to be enforced at the sites where fossil raw materials are mined but also at the sites where the sequestration takes place. |
| BIO                         | (–/0/+) Depends on the specific practised conditions in the country                                                                                                                                                                                                                                                |



|     |                                                                                                                                                             |
|-----|-------------------------------------------------------------------------------------------------------------------------------------------------------------|
|     | where the generation of the biomass and its processing takes place.                                                                                         |
| CCU | (–/0/+) Depends on the specific practised conditions in the country where the carbon capture and the processing of the obtained basic chemicals take place. |

160

161 **Table S10.** Community engagement and empowerment

| <b>Technological option</b> | <b>Rating and rationale</b>                                                                                                                                                                                                                                                                                                                                                                                                                                                                |
|-----------------------------|--------------------------------------------------------------------------------------------------------------------------------------------------------------------------------------------------------------------------------------------------------------------------------------------------------------------------------------------------------------------------------------------------------------------------------------------------------------------------------------------|
| FOS                         | (–/0/+) Depends on the specific practised conditions in the country where mining and processing takes place. However, due to the specific geographical location of the fossil deposits, the freedom to choose the fossil resources which are generated with high social standards might be limited.                                                                                                                                                                                        |
| FOS/CCS                     | (–/0/+) Depends on the specific practised conditions in the country where mining and processing takes place. However, due to the specific geographical location of the fossil deposits, the freedom to choose materials which are generated with high social standards might be limited. In addition, with this option, high social standards not only have to be enforced at the places where fossil raw materials are mined, but also at the places where the sequestration takes place. |
| BIO                         | (–/0/+) Depends on the specific practised conditions in the country where generation of the biomass and its processing takes place. An advantage could be that BIO by its nature is less centralised and can support more communities including those outside metropolitan areas.                                                                                                                                                                                                          |
| CCU                         | (–/0/+) Depends on the specific practised conditions in the country where capture and processing of the produced basic chemicals takes place. An advantage could be that CCU by its nature is decentralised and can support more communities.                                                                                                                                                                                                                                              |

162

163

164 **Economic pillar**

165 **Table S11.** Job creation

| <b>Technological option</b> | <b>Rating and rationale</b>                                                                                                                                                                                                                                                                                                                                                                                                                                                                                    |
|-----------------------------|----------------------------------------------------------------------------------------------------------------------------------------------------------------------------------------------------------------------------------------------------------------------------------------------------------------------------------------------------------------------------------------------------------------------------------------------------------------------------------------------------------------|
| FOS                         | (-/0) Little potential of creating additional jobs. Anyway, because conventional fossil fuel mining is coming under increasing pressure due to its negative environmental impact, the highly specialised jobs there are certainly at risk in the long term. In locations where fossil raw materials are mined, mining poses a major risk to long-term labour market stability.                                                                                                                                 |
| FOS/CCS                     | (0/+) Little potential of creating additional jobs in the area of mining. Anyway, because conventional fossil fuel mining is coming under increasing pressure due to its negative environmental impact, the highly specialised jobs there are certainly at risk in the long term. In locations where fossil raw materials are mined, mining poses a major risk to long-term labour market stability. There is, however, quite some potential for job creation in the area of carbon capture and sequestration. |
| BIO                         | (0/+) Little potential of creating new jobs in conventional agriculture and forestry. However, in innovative areas of generation of biomass and of its processing (third-generation biomass), there is potential of creating high-qualified jobs. It is inherently more decentralised than FOS and FOS/CSS and has the potential to create jobs in disadvantaged regions and/or outside metropolitan areas.                                                                                                    |
| CCU                         | (+) This new technology area has the potential of creating jobs. It is inherently more decentralised than FOS and FOS/CSS and has the potential to create jobs in disadvantaged regions.                                                                                                                                                                                                                                                                                                                       |

166

167 **Table S12.** Long-term success of sector-specific investments

| <b>Technological option</b> | <b>Rating and rationale</b>                                                                                                                                                                                                                                                                                                                                                                                                                                                                                                          |
|-----------------------------|--------------------------------------------------------------------------------------------------------------------------------------------------------------------------------------------------------------------------------------------------------------------------------------------------------------------------------------------------------------------------------------------------------------------------------------------------------------------------------------------------------------------------------------|
| FOS                         | (-) The extraction and use of fossil raw materials cannot be regarded as a promising investment in the period up to 2050. It harbours a cluster risk due to the high concentration among a small number of players. It is demonstrably susceptible to market fluctuations and economic cycles. It is not flexible in its choice of location and is therefore intrinsically susceptible to political crises, sanctions, coercion, and expropriation. It is also expected that there will be greater fiscal pressure as some countries |

|         |                                                                                                                                                                                                                                                                  |
|---------|------------------------------------------------------------------------------------------------------------------------------------------------------------------------------------------------------------------------------------------------------------------|
|         | strive to make this industry less financially attractive (e.g. by EU taxonomy <sup>32</sup> ).                                                                                                                                                                   |
| FOS/CCS | (0) Essentially very similar to FOS. The fiscal pressure might, however, be less intense as in the case of FOS. Carbon capture and sequestration activities are receiving some support from government actors.                                                   |
| BIO     | (-/0/+) Depends very much on the specific way the biomass is generated and processed, such as conventional agriculture or third-generation biomass processing <sup>33</sup> . In particular the latter option offers opportunities for robust long-term returns. |
| CCU     | (-/0/+) In the long term (with a time horizon of 2050), the opportunities are positive. With increased capacities for renewable energy and hydrogen, the field will gain additional momentum <sup>34</sup> .                                                     |

168

169 **Table S13.** Diversity (redundancy) of supply

| <b>Technological option</b> | <b>Rating and rationale</b>                                                                                                                                                                                                                                                                                                                           |
|-----------------------------|-------------------------------------------------------------------------------------------------------------------------------------------------------------------------------------------------------------------------------------------------------------------------------------------------------------------------------------------------------|
| FOS                         | (-) In the area of fossil fuels and basic chemicals, there is a very high concentration of relatively few players. In addition, the massive distribution infrastructure required (ports and pipelines) leads to oligopolies that limit the opportunities for supply chain diversification.                                                            |
| FOS/CCS                     | (-) In terms of fossil raw materials essentially the same as FOS. As sequestration will also be bound to a relatively limited number of sites, this could also lead to a limited choice of sequesterers.                                                                                                                                              |
| BIO                         | (0/+) Depends on the specific source of biomass. Some agricultural products are produced in few dominating countries.                                                                                                                                                                                                                                 |
| CCU                         | (0/+) Due to the large geographic distribution of CO <sub>2</sub> capture, we assume that the corresponding supply chains to be developed will be relatively diverse. However, CCU fed with CO <sub>2</sub> isolated by direct air capture could be geographically tied to areas where huge capacities for sustainable power production is available. |

170

171 **Table S14.** Promoting technological innovation

| <b>Technological option</b> | <b>Rating and rationale</b>                                                   |
|-----------------------------|-------------------------------------------------------------------------------|
| FOS                         | (-/0) The technologies for extracting fossil fuels still have little room for |

|         |                                                                                                                                                                                                                                         |
|---------|-----------------------------------------------------------------------------------------------------------------------------------------------------------------------------------------------------------------------------------------|
|         | technical improvement and are about to approaching the limits of what is economically and technically feasible.                                                                                                                         |
| FOS/CCS | (0/+) Although mining and processing of fossil raw materials is probably close to its economically achievable optimal performance, the carbon capture and sequestration technology has still a large potential for further development. |
| BIO     | (-/0/+) Depends on how the biomass is being generated. Some of the technological options, in particular the biotechnological ones, have a large innovation potential.                                                                   |
| CCU     | (+) The technology is relatively young and has significant development potential.                                                                                                                                                       |

172

## 173 References

- 174 1. Primary chemical production in the Sustainable Development Scenario, 2000-2030,  
175 [https://www.iea.org/data-and-statistics/charts/primary-chemical-production-in-the-](https://www.iea.org/data-and-statistics/charts/primary-chemical-production-in-the-sustainable-development-scenario-2000-2030)  
176 [sustainable-development-scenario-2000-2030](https://www.iea.org/data-and-statistics/charts/primary-chemical-production-in-the-sustainable-development-scenario-2000-2030), (accessed April, 2023).
- 177 2. D. Saygin and D. Gielen, *Energies*, 2021, **14**, 3772.
- 178 3. D. R. MacFarlane, P. V. Cherepanov, J. Choi, B. H. R. Suryanto, R. Y. Hodgetts, J. M.  
179 Bakker, F. M. Ferrero Vallana and A. N. Simonov, *Joule*, 2020, **4**, 1186-1205.
- 180 4. S. Navarro-Jaen, M. Virginie, J. Bonin, M. Robert, R. Wojcieszak and A. Y. Khodakov,  
181 *Nat Rev Chem*, 2021, **5**, 564-579.
- 182 5. *Innovation Outlook: Renewable Methanol*, IRENA and Methanol Institute, Abu Dhabi,  
183 2021.
- 184 6. S. M. Sadrameli, *Fuel*, 2015, **140**, 102-115.
- 185 7. A. M. Niziolek, O. Onel and C. A. Floudas, *AIChE Journal*, 2016, **62**, 1531-1556.
- 186 8. *The Future of Petrochemicals*, IEA, Paris, 2018.
- 187 9. W. J. Mattson, *Annual Review of Ecology and Systematics*, 1980, **11**, 119-161.
- 188 10. *World Food and Agriculture – Statistical Yearbook 2023*, The Food and Agriculture  
189 Organization of the United Nations, Rome, 2023.
- 190 11. V. Smil, *AMBIO: A Journal of the Human Environment*, 2002, **31**, 126-131.
- 191 12. K. C. Cameron, H. J. Di and J. L. Moir, *Annals of applied biology*, 2013, **162**, 145-173.
- 192 13. *Ammonia Technology Roadmap*, IEA, Paris, 2021.
- 193 14. *Ammonia: zero-carbon fertiliser, fuel and energy store*, The Royal Society, 2020.
- 194 15. S. Ghavam, M. Vahdati, I. A. G. Wilson and P. Styring, *Frontiers in Energy Research*,  
195 2021, **9**.
- 196 16. *Low-carbon Ammonia: Facilitating the Transition to a Sustainable Future*, S&P Global,  
197 2023.
- 198 17. M. R. Gogate, *Petroleum Science and Technology*, 2019, **37**, 559-565.
- 199 18. N. Wang, H. Wang, H. Xiong, W. Song and W. Qian, in *Industrial Arene Chemistry*, 2023,  
200 DOI: 10.1002/9783527827992.ch18, pp. 479-532.
- 201 19. D. Wang, Z. Xie, M. D. Porosoff and J. G. Chen, *Chem*, 2021, **7**, 2277-2311.
- 202 20. Y. Xiong, Y. Liu, G. Xin, S. Xie, H. Luo, L. Xiao, X. Wu, T. Hong and B. Tang, *Front Surg*,  
203 2022, **9**, 981669.
- 204 21. Braskem expands its biopolymer production by 30% following an investment of US\$ 87  
205 million, [https://www.braskem.com.br/usa/news-detail/braskem-expands-its-](https://www.braskem.com.br/usa/news-detail/braskem-expands-its-biopolymer-production-by-30-following-an-investment-of-us-87-million)  
206 [biopolymer-production-by-30-following-an-investment-of-us-87-million](https://www.braskem.com.br/usa/news-detail/braskem-expands-its-biopolymer-production-by-30-following-an-investment-of-us-87-million), (accessed  
207 March, 2024).
- 208 22. *Bio-Based Chemicals*, IEA Bioenergy Task 42, 2020.

- 209 23. LanzaTech, LanzaTech Produces Ethylene from CO<sub>2</sub>, Changing the Way We Make  
210 Products Today, [https://lanzatech.com/lanzatech-produces-ethylene-from-co2-](https://lanzatech.com/lanzatech-produces-ethylene-from-co2-changing-the-way-we-make-products-today/)  
211 [changing-the-way-we-make-products-today/](https://lanzatech.com/lanzatech-produces-ethylene-from-co2-changing-the-way-we-make-products-today/), (accessed June, 2024).
- 212 24. OECD, *Global Plastics Outlook: Policy Scenarios to 2060*, OECD Publishing, Paris, 2022.
- 213 25. Fuels-Higher and Lower Calorific Values, [https://www.engineeringtoolbox.com/fuels-](https://www.engineeringtoolbox.com/fuels-higher-calorific-values-d_169.html)  
214 [higher-calorific-values-d\\_169.html](https://www.engineeringtoolbox.com/fuels-higher-calorific-values-d_169.html), (accessed March, 2024).
- 215 26. A. Valera-Medina, H. Xiao, M. Owen-Jones, W. I. David and P. Bowen, *Progress in*  
216 *Energy and combustion science*, 2018, **69**, 63-102.
- 217 27. J.-C. Guibet, *Carburants et moteurs. Tome 1*, Editions TECHNIP, 1997.
- 218 28. M. Danish and T. Ahmad, *Renewable and Sustainable Energy Reviews*, 2018, **87**, 1-21.
- 219 29. F. A. Alexis Michael Bazzanella, *Low carbon energy and feedstock for the European*  
220 *chemical industry*, DECHEMA, Frankfurt am Main, 2017.
- 221 30. *Water for hydrogen production*, IRENA and Bluerisk, Abu Dhabi, 2023.
- 222 31. É. Ujaczki, V. Stark-Rogel, M. Olbrich, M. Fuetsch and J. Backmann, *Environmental*  
223 *Sciences Europe*, 2022, **34**, 101.
- 224 32. EU taxonomy for sustainable activities, [https://finance.ec.europa.eu/sustainable-](https://finance.ec.europa.eu/sustainable-finance/tools-and-standards/eu-taxonomy-sustainable-activities_en)  
225 [finance/tools-and-standards/eu-taxonomy-sustainable-activities\\_en](https://finance.ec.europa.eu/sustainable-finance/tools-and-standards/eu-taxonomy-sustainable-activities_en), (accessed April,  
226 2024).
- 227 33. M. Lackner, in *Handbook of climate change mitigation and adaptation*, Springer, 2022,  
228 pp. 1947-1986.
- 229 34. Defossilisation Development Fund, <https://dd-fund.ch/>).
